# Supplementary material
Source: publisher site journal article supplement (https://www.dovepress.com/article/363425)
Supplement: Supplementary file 1 [file get_supplementary_file.php]

---

|    |          |       |    |    |    |    |    |    |    |          |
|----|----------|-------|----|----|----|----|----|----|----|----------|
| C1 | Normal 1 | 21915 | NA | Jing Zhu |
| C2 | Normal 2 | 25099 | NA | [ref.17] |
| C3 | Normal 3 | 392   | NA |          |
| C4 | Normal 4 | 832   | NA |          |
| C5 | Normal 5 | 7849  | NA |          |
| C6 | Normal 6 | 10537 | NA |          |

---

**Supplementary Table 2. DNA Quantification by Qubit 3.0 Fluorometer**

| <b>Sample Name</b> | <b>Conc. (ng/μl)</b> | <b>Volume (μl)</b> | <b>Quantity (μg)</b> | <b>QC Results</b> |
|--------------------|----------------------|--------------------|----------------------|-------------------|
| Patient 1          | 624.33               | 20                 | 12.49                | Pass              |
| Patient 2          | 580.41               | 20                 | 11.61                | Pass              |
| Patient 3          | 573.33               | 20                 | 11.47                | Pass              |
| Patient 4          | 639.27               | 20                 | 12.79                | Pass              |
| Patient 5          | 635.42               | 20                 | 12.71                | Pass              |
| Patient 6          | 551.42               | 20                 | 11.03                | Pass              |

**Supplementary Table 3. Quality Assessment of Sequencing Library**

| Sample Name | Size (bp) | Conc. (ng/ $\mu$ l) | Conc. (nmol/L) | Volume ( $\mu$ l) | Total Amount (ng) |
|-------------|-----------|---------------------|----------------|-------------------|-------------------|
| Patient 1   | 334       | 3.64                | 16.7           | 10                | 36.4              |
| Patient 2   | 300       | 3.25                | 16.4           | 10                | 32.5              |
| Patient 3   | 326       | 2.71                | 12.7           | 10                | 27.1              |
| Patient 4   | 318       | 1.85                | 8.96           | 10                | 18.5              |
| Patient 5   | 294       | 3.78                | 19.8           | 10                | 37.8              |
| Patient 6   | 317       | 3.42                | 16.5           | 10                | 34.2              |

**Notes:** Sequencing library was determined by Agilent 2100 Bioanalyzer using the Agilent DNA 1000 chip kit (Agilent, part # 50671504).

**Supplementary Table 4. Information of sequencing reads statistics**

| <b>Sample Name</b> | <b>Q30</b> | <b>Raw Reads</b> | <b>Clean Reads</b> | <b>Clean Ratio</b> | <b>Mapped Reads</b> | <b>Mapping Ratio</b> |
|--------------------|------------|------------------|--------------------|--------------------|---------------------|----------------------|
| Patient 1          | 92.42%     | 128,697,410      | 128,693,134        | 100.00%            | 119,218,714         | 92.64%               |
| Patient 2          | 89.10%     | 135,715,212      | 135,710,618        | 100.00%            | 119,910,588         | 88.36%               |
| Patient 3          | 92.71%     | 138,401,496      | 138,394,866        | 100.00%            | 127,378,834         | 92.04%               |
| Patient 4          | 90.76%     | 117,604,018      | 117,599,772        | 100.00%            | 107,716,908         | 91.59%               |
| Patient 5          | 89.72%     | 121,078,112      | 121,070,992        | 99.99%             | 113,477,028         | 93.72%               |
| Patient 6          | 92.06%     | 127,668,464      | 127,653,804        | 99.99%             | 117,218,652         | 91.82%               |

**Supplementary Table 5. eccDNA appeared repeatedly in at least 3 LUAD samples**

| <b>eccDNA position</b>    | <b>A1</b> | <b>A2</b> | <b>A3</b> | <b>A4</b> | <b>A5</b> | <b>A6</b> | <b>B1</b> | <b>B2</b> | <b>B3</b> | <b>B4</b> | <b>C1</b> | <b>C2</b> | <b>C3</b> | <b>C4</b> | <b>C5</b> | <b>C6</b> |
|---------------------------|-----------|-----------|-----------|-----------|-----------|-----------|-----------|-----------|-----------|-----------|-----------|-----------|-----------|-----------|-----------|-----------|
| Chr10:127362840-127363066 | 5         | 0         | 0         | 0         | 6         | 10        | 0         | 0         | 0         | 0         | 0         | 0         | 0         | 0         | 0         | 0         |
| Chr5-123032458-123032838  | 0         | 2         | 11        | 1         | 0         | 0         | 0         | 0         | 0         | 0         | 0         | 0         | 0         | 0         | 0         | 0         |
| Chr18:22741002-22741204   | 0         | 0         | 0         | 2         | 11        | 1         | 0         | 0         | 0         | 0         | 0         | 0         | 0         | 0         | 0         | 0         |
| Chr17:80024304-80024652   | 0         | 0         | 2         | 0         | 9         | 42        | 0         | 0         | 0         | 0         | 0         | 0         | 0         | 0         | 0         | 0         |
| Chr3:194943264-194943686  | 0         | 1         | 0         | 9         | 6         | 0         | 0         | 12        | 0         | 0         | 0         | 0         | 0         | 0         | 0         | 0         |
| Chr9:34169256-34169377    | 11        | 2         | 6         | 0         | 0         | 0         | 10        | 14        | 6         | 0         | 0         | 0         | 0         | 0         | 0         | 0         |
| Chr13:113672394-113672557 | 0         | 0         | 32        | 34        | 38        | 78        | 60        | 0         | 58        | 135       | 0         | 0         | 0         | 0         | 0         | 0         |
| Chr20:60314368-60314818   | 0         | 0         | 32        | 0         | 26        | 0         | 30        | 54        | 18        | 57        | 0         | 0         | 0         | 0         | 0         | 0         |
| Chr20:58695019-58695338   | 1         | 60        | 0         | 24        | 168       | 4         | 28        | 42        | 28        | 39        | 0         | 0         | 0         | 0         | 0         | 0         |

Notes: Each column represents a sample, and each row represents an eccDNA. The number represents the sample's original split reads of a certain eccDNA in the sample.

**Supplementary Table 6. The annotation results of eccDNA appeared repeatedly in LUAD samples**

| <b>eccDNA position</b>    | <b>Width</b> | <b>Annotation</b> | <b>Gene id</b> | <b>Transcript id</b> | <b>Distance to TSS</b> | <b>Gene name</b> |
|---------------------------|--------------|-------------------|----------------|----------------------|------------------------|------------------|
| Chr10-127362840-127363066 | 227          | Intron            | 1793           | Enst00000464466.1    | 114772                 | DOCK1            |
| Chr5-123032458-123032838  | 381          | Intron            | 5480           | Enst00000306442.5    | 3887                   | PPIC             |
| Chr18-22741002-22741204   | 203          | Intron            | 101927571      | Enst00000581177.1    | -9437                  | RP11-370A5.1     |
| Chr17-80024304-80024652   | 349          | Intron            | 125058         | Enst00000310924.7    | 11220                  | TBC1D16          |
| Chr3-194943264-194943686  | 423          | Distal intergenic | 152002         | Enst00000460582.1    | 143686                 | XXYLT1           |
| Chr9-34169256-34169377    | 122          | Distal intergenic | 51271          | Enst00000625521.2    | -9628                  | UBAP1            |
| Chr13-113672394-113672557 | 164          | Intron            | 6011           | Enst00000335678.7    | 5175                   | NA*              |
| Chr20-60314368-60314818   | 451          | Intron            | 693231         | Enst00000385067.1    | 5894                   | MIR646           |
| Chr20-58695019-58695338   | 320          | Promoter (<=1kb)  | 100534593      | Enst00000533788.1    | 598                    | NA*              |

**Notes:** Each row represents an eccDNA. TSS, the transcription start site. \* NA represents eccDNA mapped to the unnamed regions.
